# Supplementary material
Source: Springer Nature journal article supplement (https://www.springermedizin.de/resource/supplementary/13075_2009_2747_MOESM6_ESM.pdf/9692792)

LGALS3BP  
 $p=0.033$

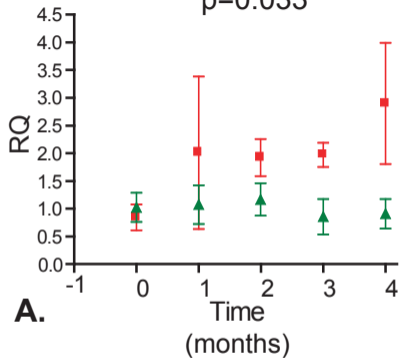

OAS1  
 $p=0.041$

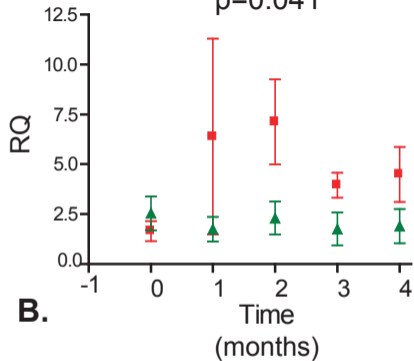

Mean 5 genes  
 $p=0.022$

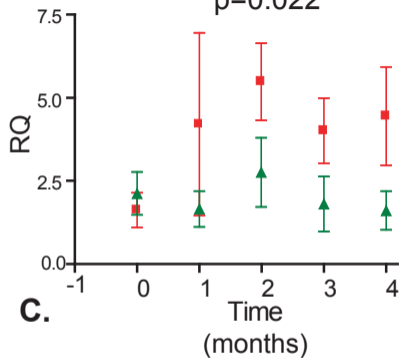

Supplement: MOESM6 [file 9692792]
